# Supplementary material for: Identification of distinct dermatologist behavioral phenotypes in actinic keratosis management
Source: Research Square preprint supplement (doi:10.21203/rs.3.rs-6843420/v1), 2025-09-17
Supplement: Supplementary file 1 [file 391c926df49a84bfbf5cdd08.docx]

**Online Resource 1: Cluster membership by subcategories of years of practice and dermatologist gender.** Different superscript letters between means or percentages indicate that the means or percentages were significantly different at a significance level of α=0.05 in Tukey-Kramer *post-hoc* testing or α=0.008 in Chi-square *post-hoc* testing.

| **Subset** | **Measure** | **Field Treatment and Destructions (mean and 95% CI or %)** | **Field Treatment (mean and 95% CI or %)** | **Destructions (mean and 95% CI or %)** | **Group Difference** |
| --- | --- | --- | --- | --- | --- |
| **Men** | **Years of Experience** | 20.6 (20.0, 21.1)a | 21.9 (20.6, 23.2)a | 27.6 (26.5, 28.6)b | **p<.001**  **η²=.03** |
| **Women** | **Years of Experience** | 14.3 (14.0, 14.6)a | 15.4 (14.6, 16.3)a | 18.2 (17.4, 19.1)b | **p<.001**  **η²=.01** |
| **<7 years of practice** | **Male (%)** | 38.5a | 39.7a | 46.9b | **p=.05**  **V=.05** |
| **7-17 years of practice** | **Male (%)** | 34.6a | 33.3a | 36.3a | **p=.01**  **V=.05** |
| **18-28 years of practice** | **Male (%)** | 42.8a | 42.1a | 51.0b | **p=.02**  **V=.06** |
| **>28 years of practice** | **Male (%)** | 64.8a | 64.9a | 75.4b | **p<.001**  **V=.09** |
